# Supplementary material for: Key Residues Affecting Binding Affinity of Sirex noctilio Fabricius Odorant-Binding Protein (SnocOBP9) to Aggregation Pheromone
Source: MDPI journal article supplement (doi:10.3390/ijms23158456), 2022-07-30
Supplement: s1 [file s1]

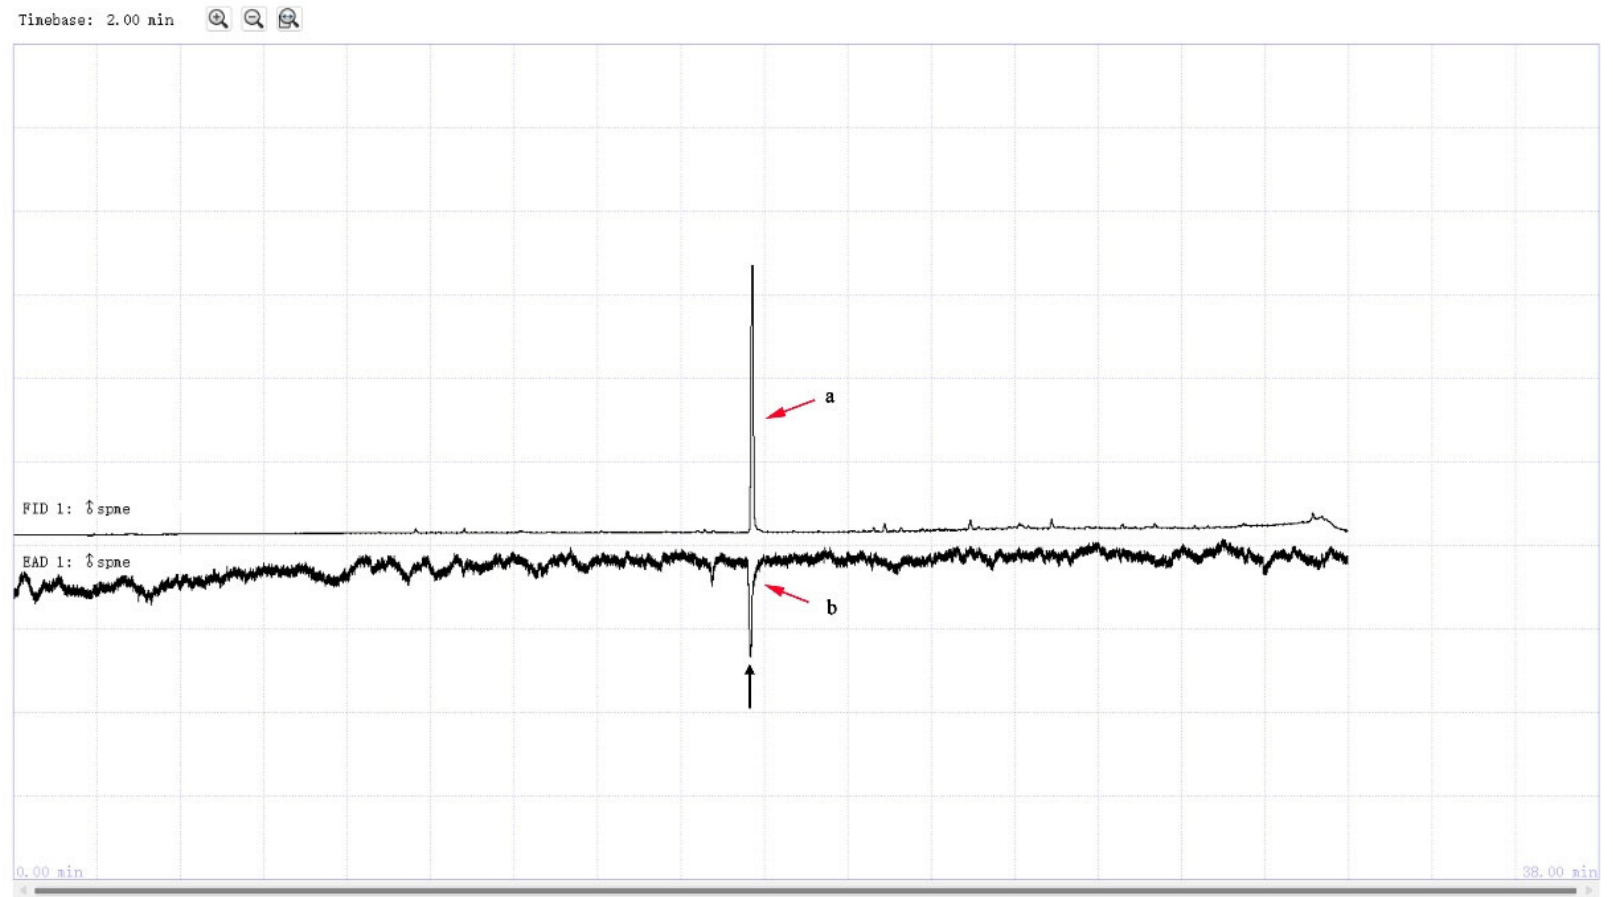

**Figure S1.** GC-EAD of *Sirex noctilio* to the insect aggregation pheromones released by male adults after SPME. a: (Z)-3-decen-ol; b: Male-consistent antennal response.

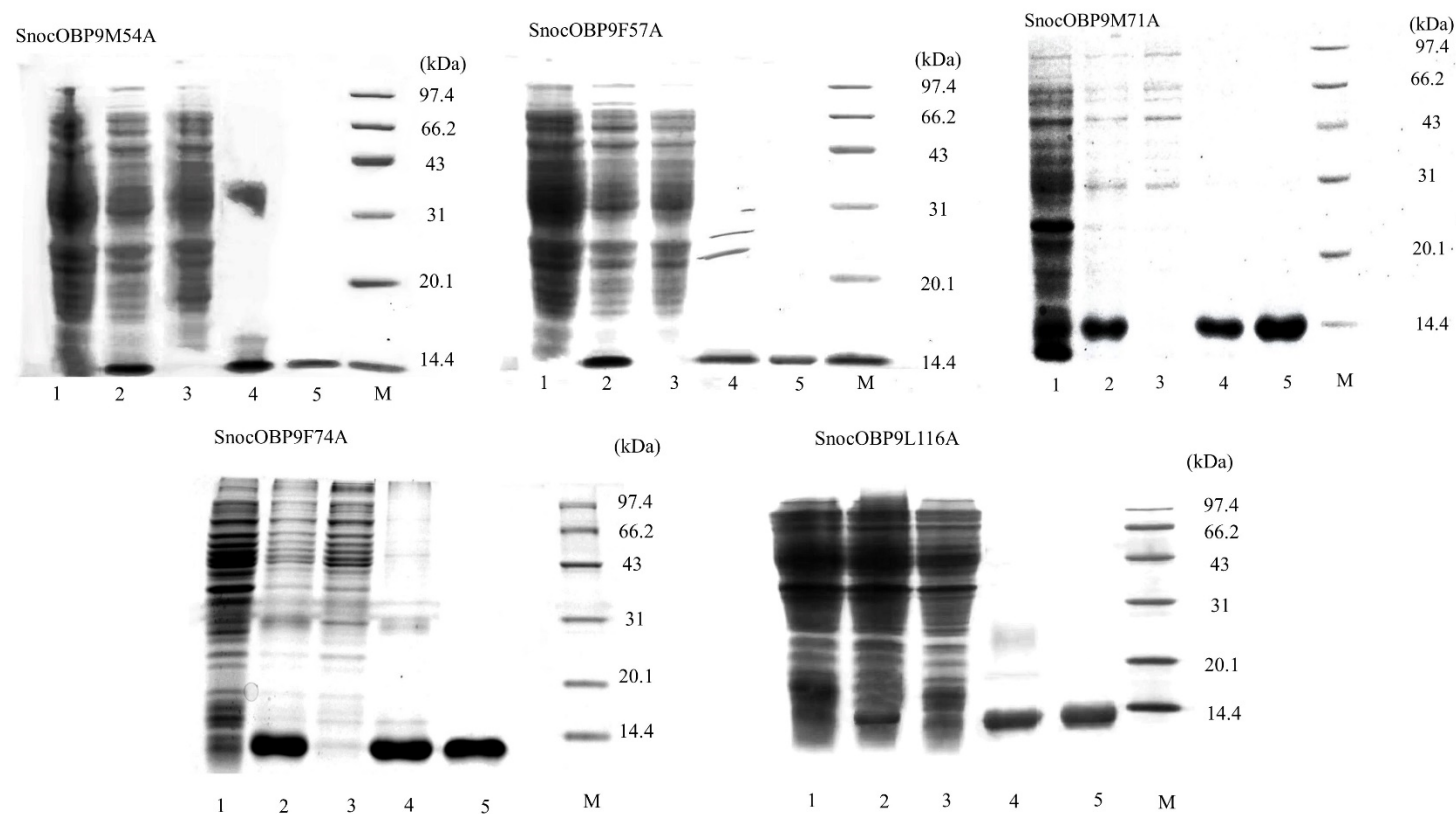

**Figure S2.** SDS-PAGE analyses of the expression and purification of recombinant SnocOBP9-MT. Lane 1 represented the bacterial cells before inducing by IPTG; lane 2 represented the bacterial cells induced by IPTG; lane 3 represented the supernatant of the bacterial cells; lane 4 represented the inclusion body of the bacterial cells; lane 5 represented purified recombinant protein; lane M represented molecular marker

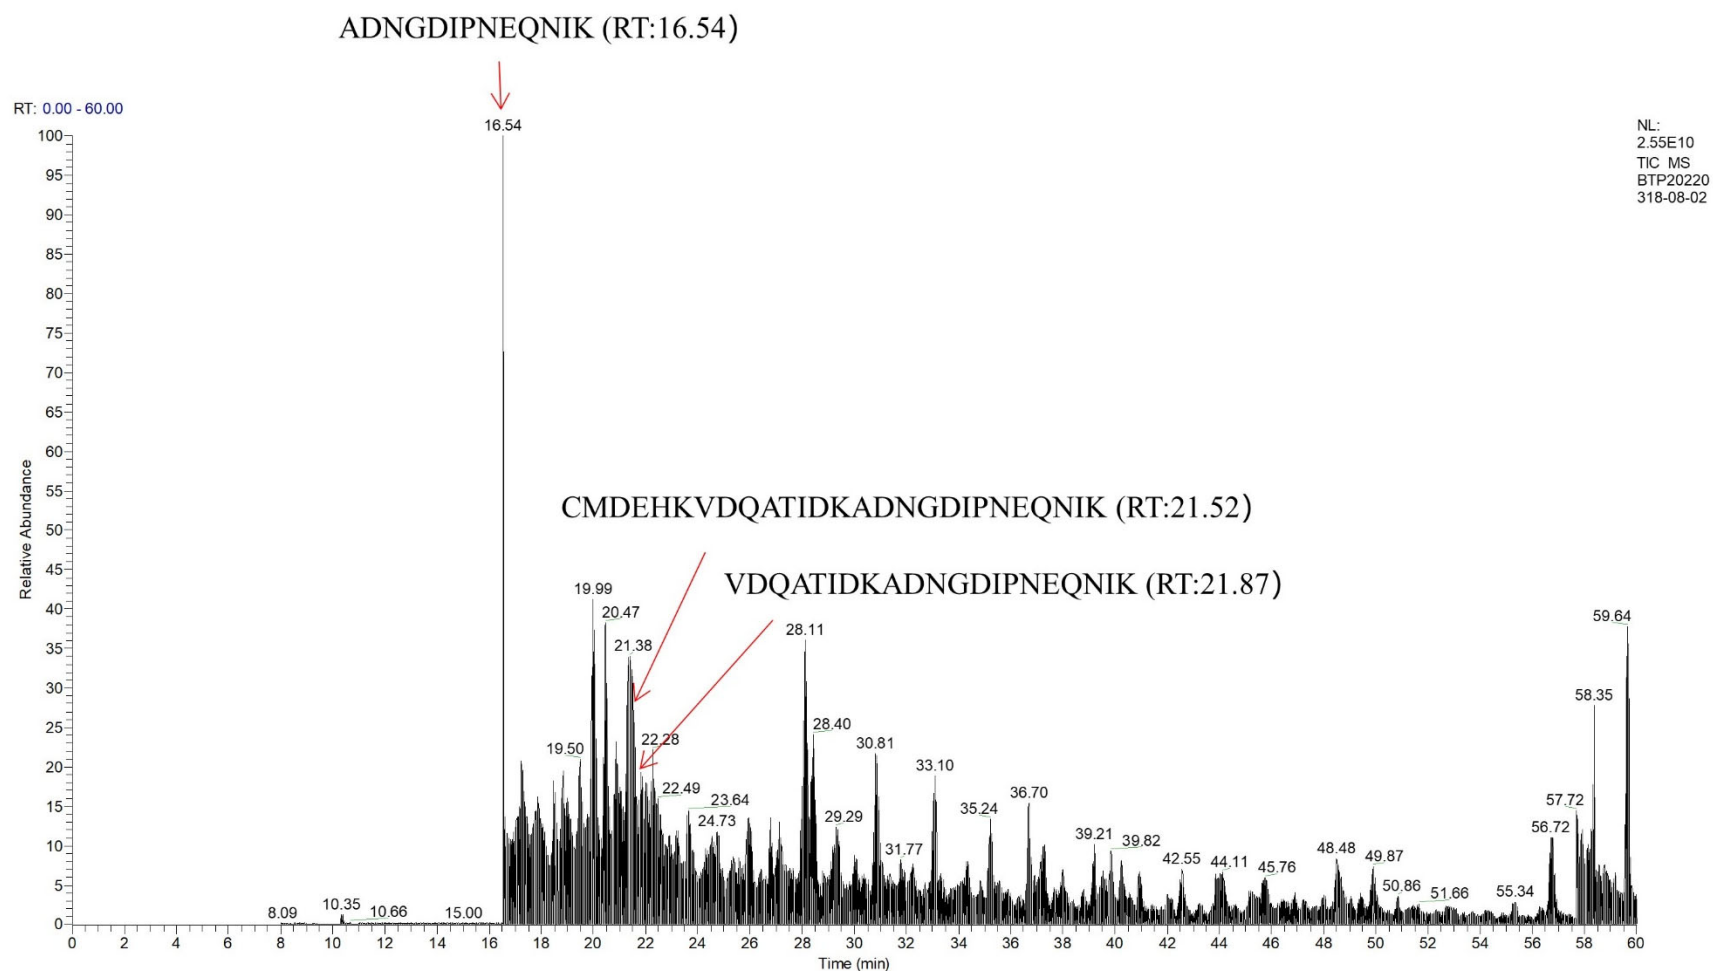

**Figure S3.** Total Ion Chromatogram of recombinant SnocOBP9 sample. The abscissa represents the scan time, and the ordinate represents the relative abundance of ions.

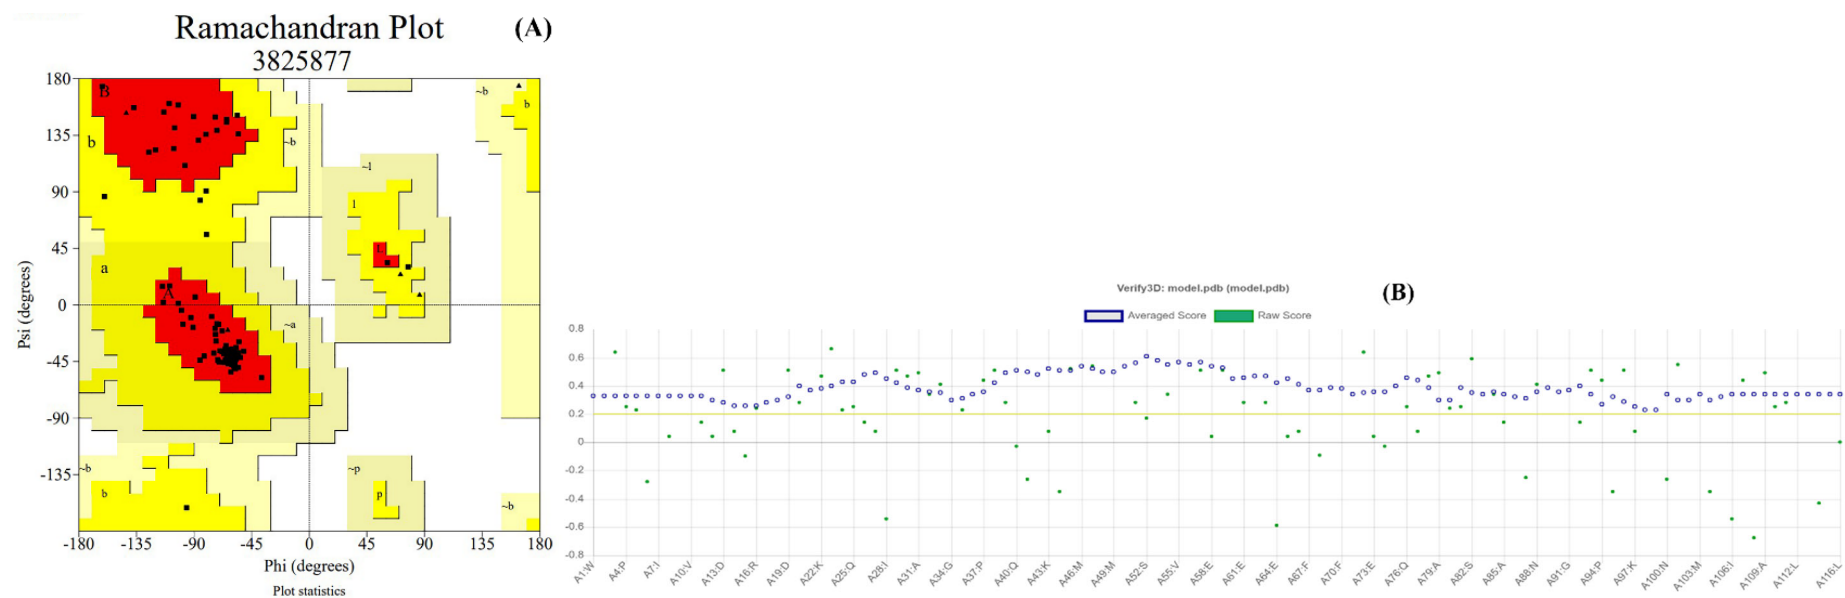

**Figure S4.** (A): Ramachandran plot and (B): Verify 3D plots of SnocOBP9.

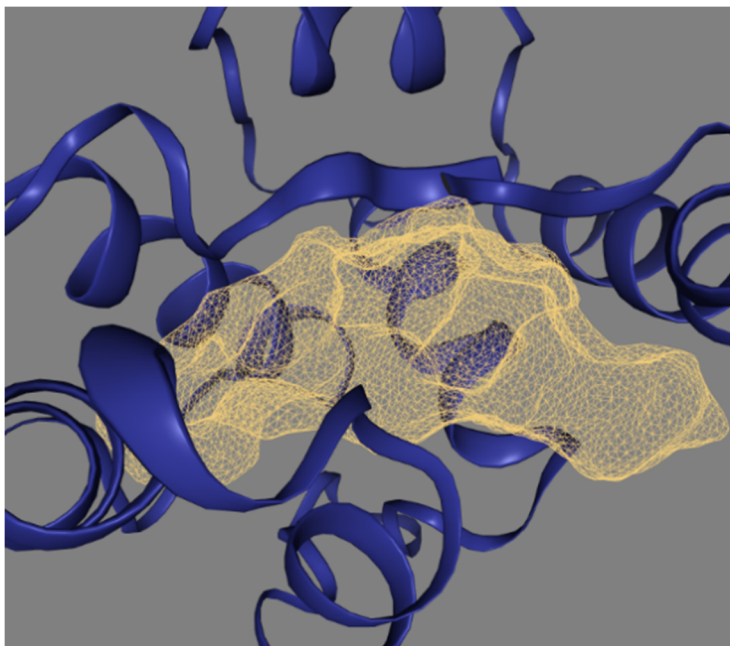

(A)

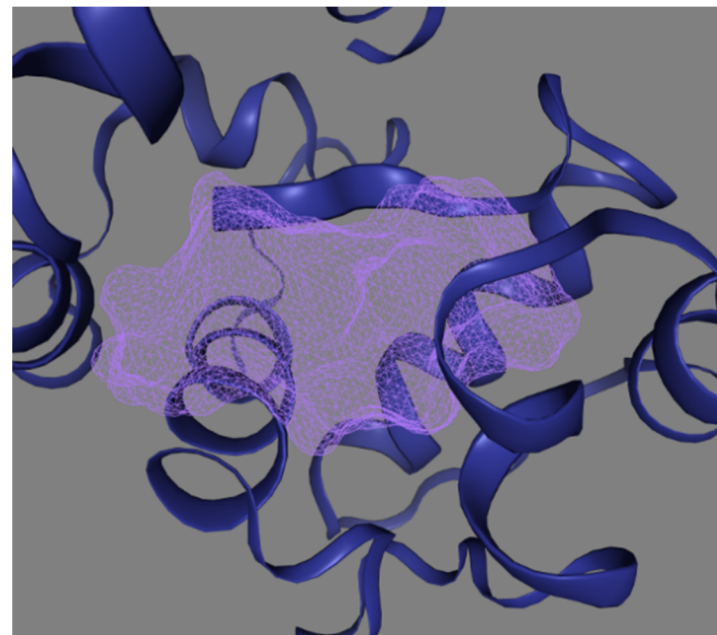

(B)

**Figure S5.** (A): AmelASP1 binding pocket; (B): SnocOBP9 binding pocket.

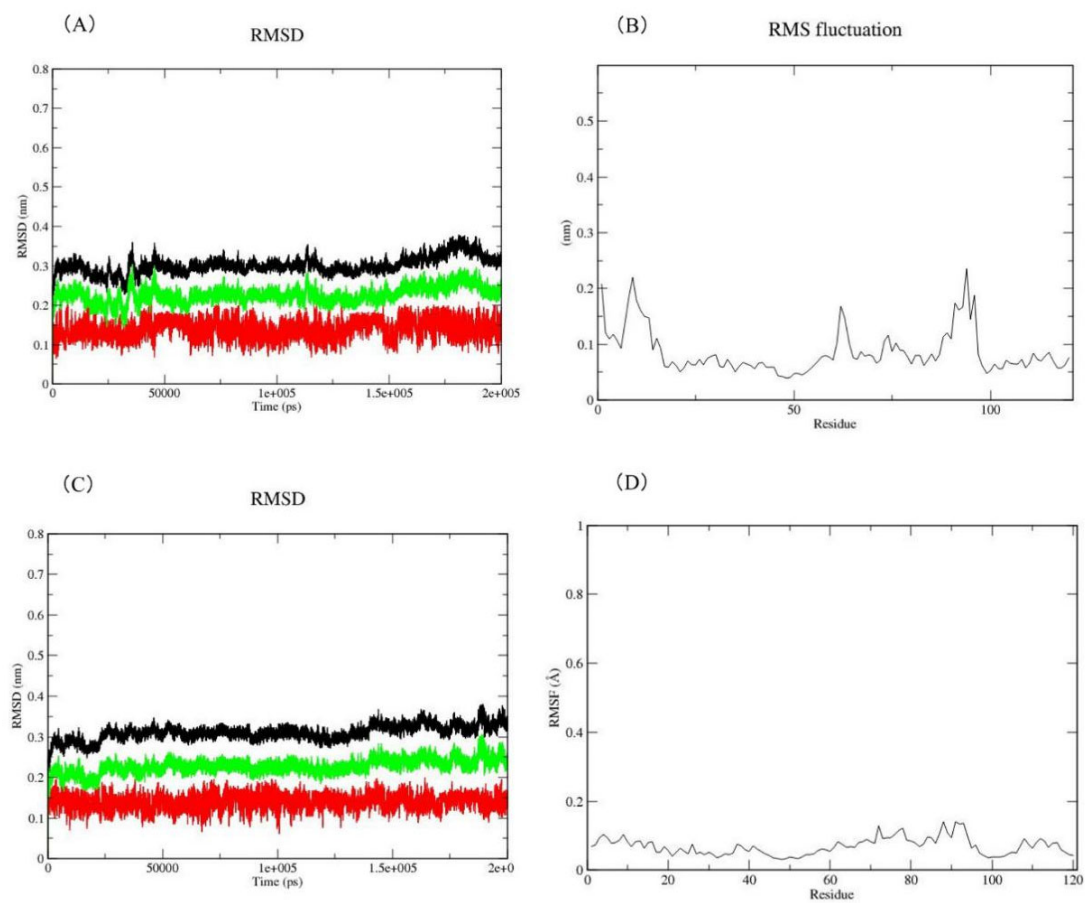

**Figure S6.** The two repetitions of the 200-ns MD simulations of the SnocOBP9-Z3D complexes. (A) and (C): The time-evolution RMSD curves of SnocOBP9-Z3D complex; (B) and (D): SnocOBP9-Z3D complex RMSF curve.

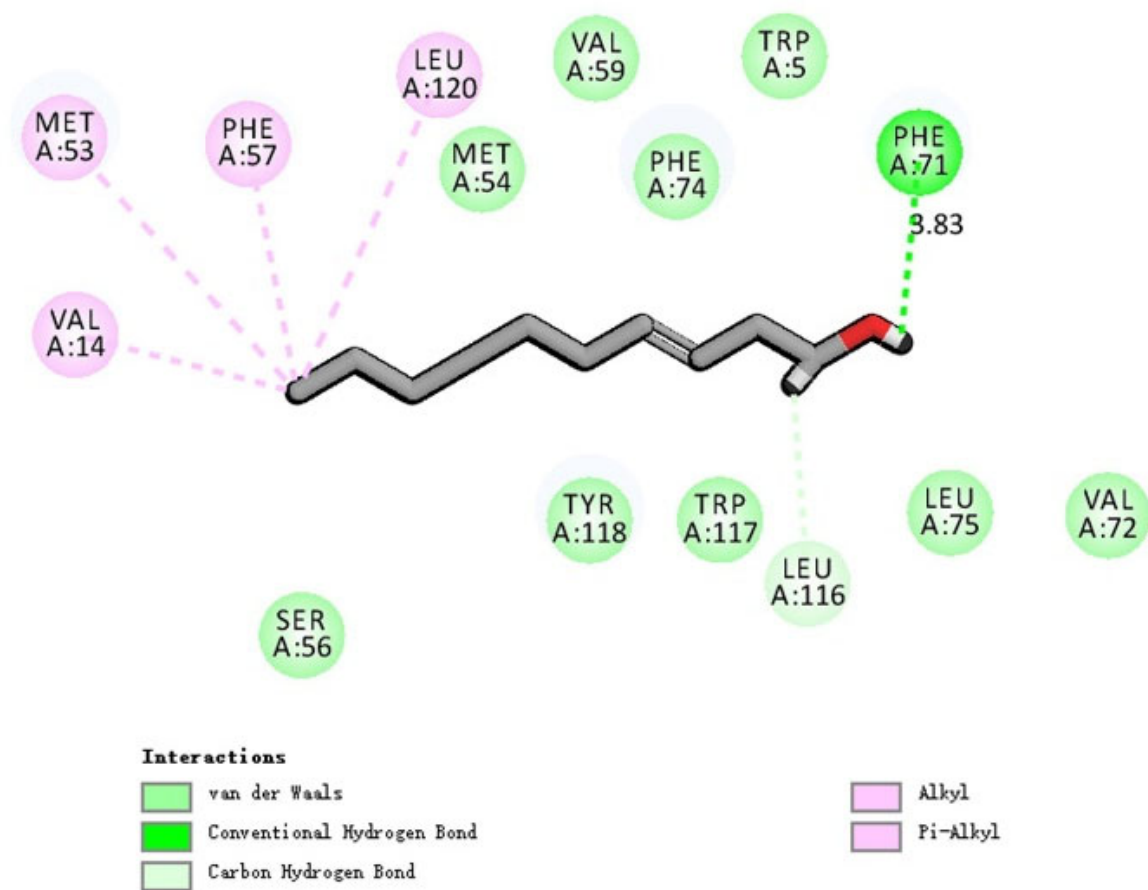

**Figure S7.** 2D diagram plot of SnocOBP9-Z3D interaction, 3.83 indicates the distance of the hydrogen bond between residue Phe 71 and Z3D.

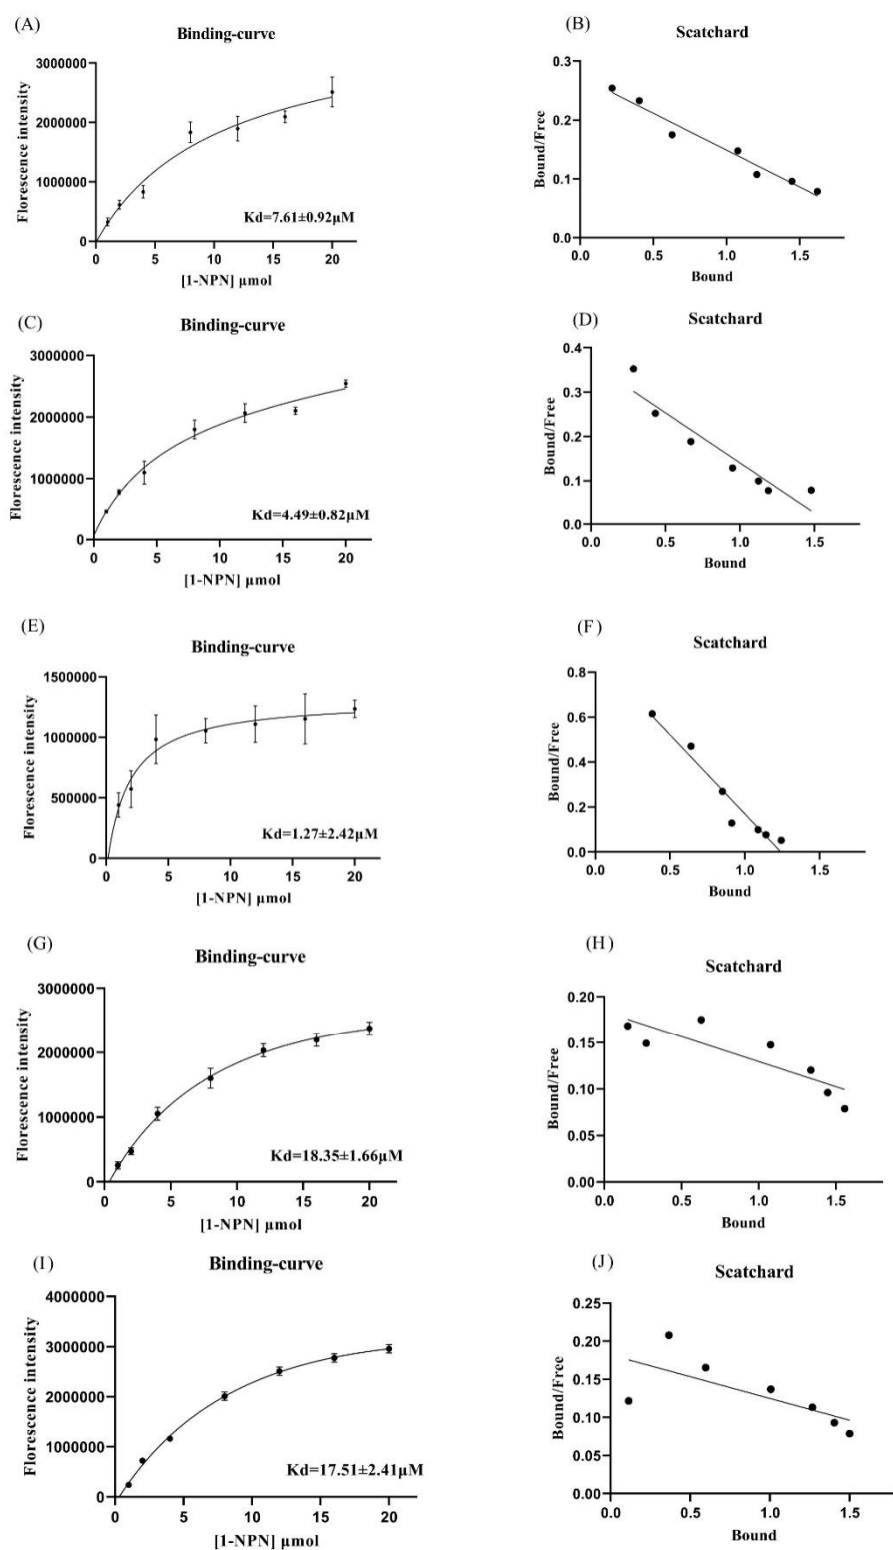

**Figure S8.** Binding curves of 1-NPN to SnocOBP9 mutants with relative Scatchard plots. (A) and (B): SnocOBP9M54A; (C) and (D): SnocOBP9F57A; (E) and (F): SnocOBP9F71A; (G) and (H): SnocOBP9F74A; (I) and (J): SnocOBP9L116A



**Table S1.** Autodock Vina score.

| Conformation | Binding energy <sup>a</sup> |
|--------------|-----------------------------|
| 1            | -6.67                       |
| 2            | -6.5                        |
| 3            | -6.48                       |
| 4            | -6.38                       |
| 5            | -6.25                       |
| 6            | -6.15                       |

<sup>a</sup>All energy values are given in kcal/mol

**Table S2.** The Computational Alanine Scanning (CAS) for the important residues contributing to the binding mode.

| Complex      | Mutation   | State after Mutation | Mutation Energy <sup>a</sup> ( $\Delta\Delta G_{mut}$ ) |
|--------------|------------|----------------------|---------------------------------------------------------|
| SnocOBP9-Z3D | MET54>ALA  | DESTABILIZING        | 0.58                                                    |
|              | PHE57>ALA  | DESTABILIZING        | 0.54                                                    |
|              | PHE71>ALA  | DESTABILIZING        | 1.18                                                    |
|              | PHE74>ALA  | DESTABILIZING        | 1.42                                                    |
|              | LEU116>ALA | DESTABILIZING        | 0.55                                                    |

<sup>a</sup>All energy values are given in kcal/mol.

**Table S3.** Renaturation solution type and the renaturation process.

| Renaturation solution type | Sodium chloride <sup>a</sup> | Tris-HCl <sup>b</sup> | Urea <sup>a</sup> | Reduced glutathione <sup>b</sup> | Oxidized glutathione <sup>b</sup> | Glycerol | pH  | Solvent          |
|----------------------------|------------------------------|-----------------------|-------------------|----------------------------------|-----------------------------------|----------|-----|------------------|
| Renaturation solution A    | 0.5                          | 20                    | 8                 | 5                                | 0.5                               | 10%      | 8.0 | Ultrapure water  |
| Renaturation solution B    | 0.5                          | 20                    | 4                 | 5                                | 0.5                               | 10%      | 8.0 | Ultrapure water  |
| Renaturation solution C    | 0.5                          | 20                    | 3                 | 5                                | 0.5                               | 10%      | 8.0 | Ultrapure water  |
| Renaturation solution D    | 0.5                          | 20                    | 2                 | 5                                | 0.5                               | 10%      | 8.0 | Ultrapure water  |
| Renaturation solution E    | 0.5                          | 20                    | 1                 | 5                                | 0.5                               | 10%      | 8.0 | Ultrapure water  |
| Renaturation solution F    | 0.5                          | 20                    | 0.5               | 5                                | 0.5                               | 10%      | 8.0 | Ultrapure water  |
| Renaturation solution G    | 0.5                          | 20                    | -                 | -                                | -                                 | 10%      | 8.0 | Ultrapure water  |
| Renaturation solution H    | -                            | -                     | -                 | -                                | -                                 | -        | 8.0 | PBS <sup>c</sup> |

<sup>a</sup> All values are given in mol/L.

<sup>b</sup> All values are given in mmol/L.

<sup>c</sup> Phosphate buffer solution value is given in 0.01 mol/L.

Dilute the protein concentration to less than 1 mg/ml, dialyzed with the renaturation solution, change it every 6 hours, replace from A-H. And finally determine the concentration by BCA, below 1 mg/ml, use the ultrafiltration tube concentration, and finally re-set the concentration, Save at -20 °C.
